# Supplementary material for: Nanoscale LuFeO3: shape dependent ortho/hexa-phase constitution and nanogenerator application
Source: Royal Society of Chemistry journal article supplement (doi:10.1039/c8nr07825d), 2018-01-01
Supplement: c8nr07825d1.pdf [file c8nr07825d1.pdf]

## Electronic Supplementary Information

### Nanoscale $\text{LuFeO}_3$ : Shape dependent ortho/hexa phase constitution and nanogenerator application

*Smita Chaturvedi, ‡<sup>\*a</sup> Sachin Kumar Singh, ‡<sup>b</sup> Priyank Shyam,<sup>c</sup> Mandar M. Shirolkar,<sup>d,e</sup> Swathi Krishna,<sup>a</sup> R. B0oomishankar<sup>\*b</sup> and Satishchandra Ogale<sup>\*a</sup>*

#### 1. Sewing Machine set up

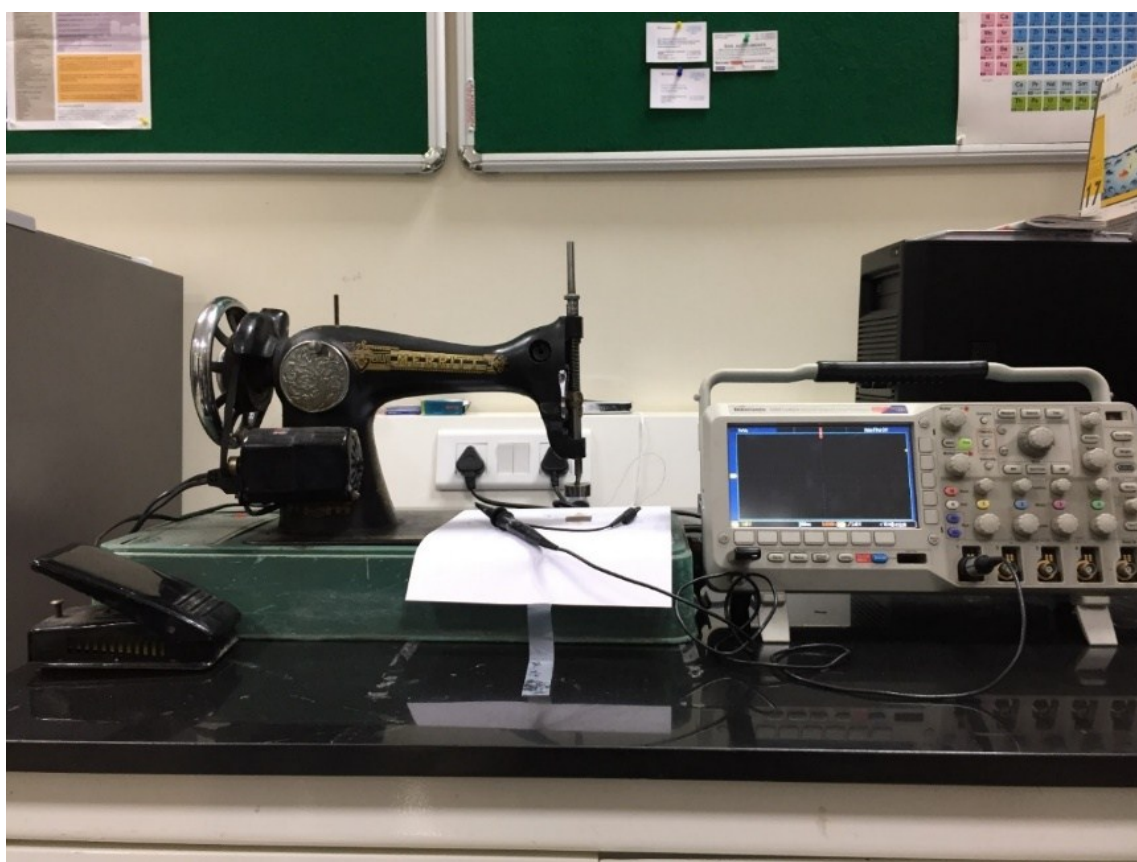

Figure S12. Sewing Machine set up for nanogenerator device measurement.

## 2. X ray diffraction and refinement

The diffraction patterns were collected in a  $2\theta$  angular range of  $10-80^\circ$  with a step size of  $0.009^\circ$ . Total data acquisition time per scan was approx. 9 hours to ensure collection of diffraction patterns with good resolution and high signal-to-noise ratio. The lattice parameters and critical structural parameters were obtained by Rietveld refinement using the software FULLPROF SUITE. Instrumental broadening effects were determined by measurement of a NIST SRM 660c ( $\text{LaB}_6$ ) sample under same conditions as all samples and compensated in all subsequent refinements.

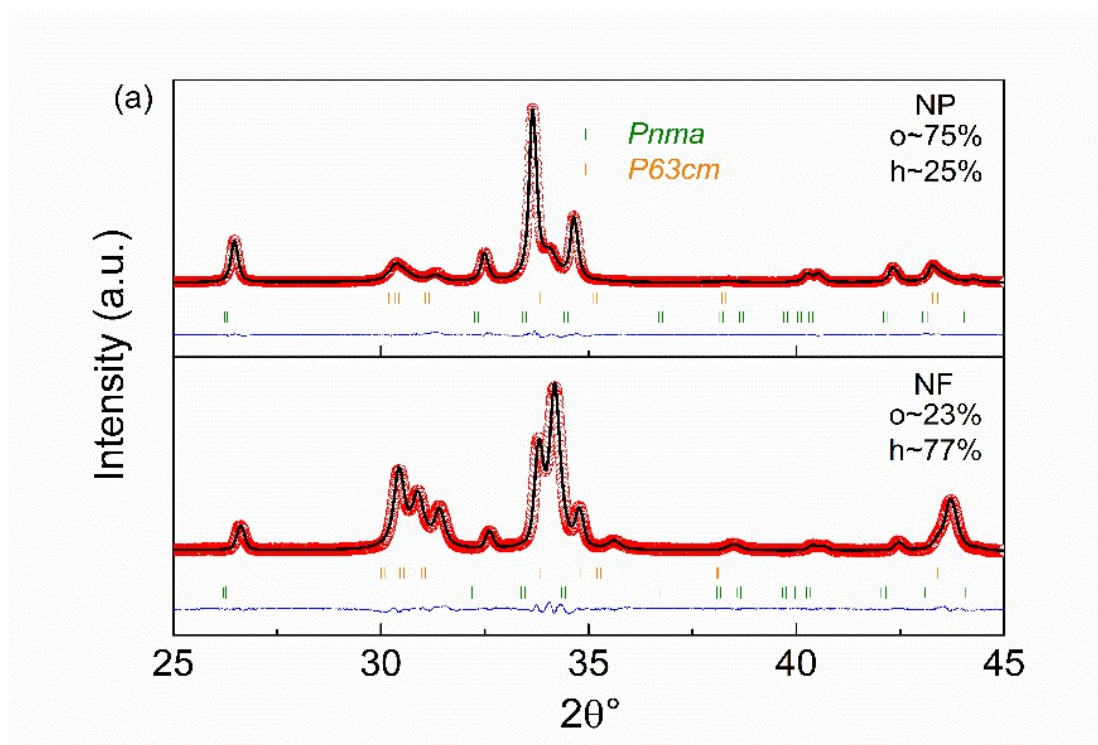

Figure S2 Showing refined XRD patterns for  $2\theta$  range 25 to 45.
